# Supplementary material for: Evidence of Local Persistence of Human Anthrax in the Country of Georgia Associated with Environmental and Anthropogenic Factors
Source: PubMed Central journal article supplement (PMC3764226; doi:10.1371/journal.pntd.0002388), 2013-09-05

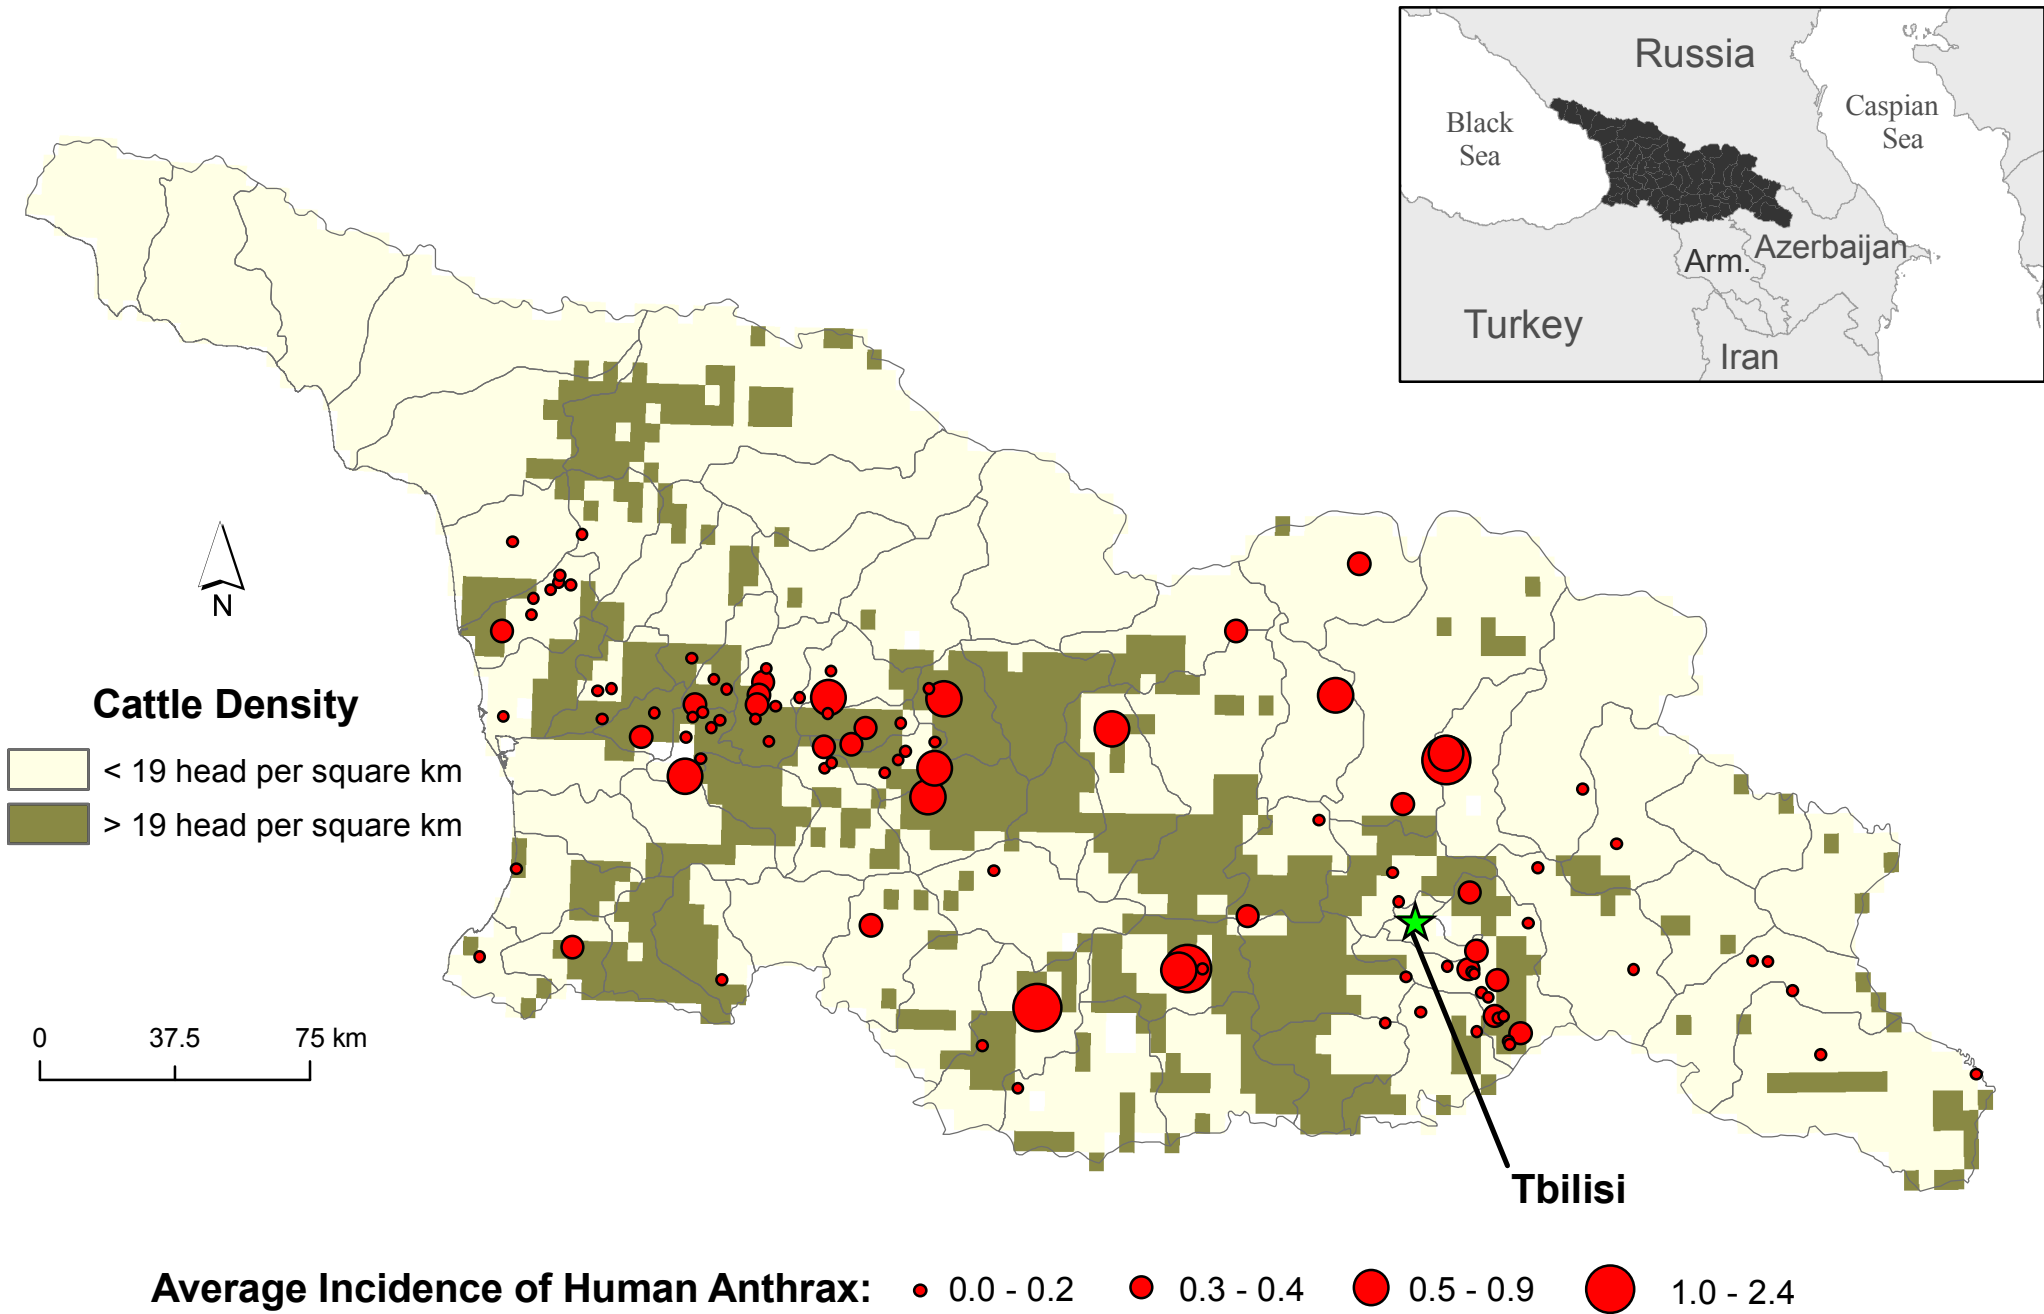

Supplement: pntd.0002388.s001.pdf [file pntd.0002388.s001.pdf]
